# Supplementary material
Source: PubMed Central journal article supplement (PMC6640780)

**A Thermally Crosslinked Functionalized Polydicyclopentadiene (*f*PDCPD)  
with a High  $T_g$  and Tunable Surface Energy**

Jun Chen, Fraser P. Burns, Matthew G. Moffitt, and Jeremy E. Wulff\*

Department of Chemistry, University of Victoria,  
Victoria, British Columbia, Canada V8W 3V6

**Supporting Information**

**Index**

|                                                                                                                                   |     |
|-----------------------------------------------------------------------------------------------------------------------------------|-----|
| <b>Figure S1A.</b> GPC traces of a freshly-prepared (~4-hour-old) sample of polymer <b>5</b> .                                    | S2  |
| <b>Figure S1B.</b> GPC refractive index trace of a 2-day-old sample of polymer <b>5</b> .                                         | S3  |
| <b>Figure S2.</b> Comparison between freshly prepared polymer <b>5</b> solution and 3-day-old suspension.                         | S3  |
| <b>Table S1.</b> Measured Contact Angles for <i>f</i> PDCPD and PDCPD.                                                            | S4  |
| <b>Figure S3.</b> Apparatus used for the preparation of slides half coated with polymer <b>6</b> and half with polymer <b>7</b> . | S4  |
| <b>Figure S4.</b> $^1\text{H}$ NMR spectrum for compounds <b>3</b> and <b>4</b> (prepared as a mixture).                          | S5  |
| <b>Figure S5.</b> $^{13}\text{C}$ NMR spectrum for compounds <b>3</b> and <b>4</b> (prepared as a mixture).                       | S5  |
| <b>Figure S6.</b> $^1\text{H}$ NMR spectrum for partially purified compound <b>3</b> .                                            | S6  |
| <b>Figure S7.</b> $^1\text{H}$ NMR spectrum for partially purified compound <b>4</b> .                                            | S6  |
| <b>Figure S8.</b> $^1\text{H}$ NMR spectrum for linear polymer <b>5</b> .                                                         | S7  |
| <b>Figure S9.</b> $^{13}\text{C}$ NMR spectrum for linear polymer <b>5</b> .                                                      | S7  |
| <b>Figure S10.</b> HSQC spectrum for linear polymer <b>5</b> .                                                                    | S8  |
| <b>Figure S11.</b> COSY spectrum for linear polymer <b>5</b> .                                                                    | S9  |
| <b>Figure S12.</b> Estimated molecular weight of <b>5</b> by NMR (in $\text{CD}_2\text{Cl}_2$ ).                                  | S10 |

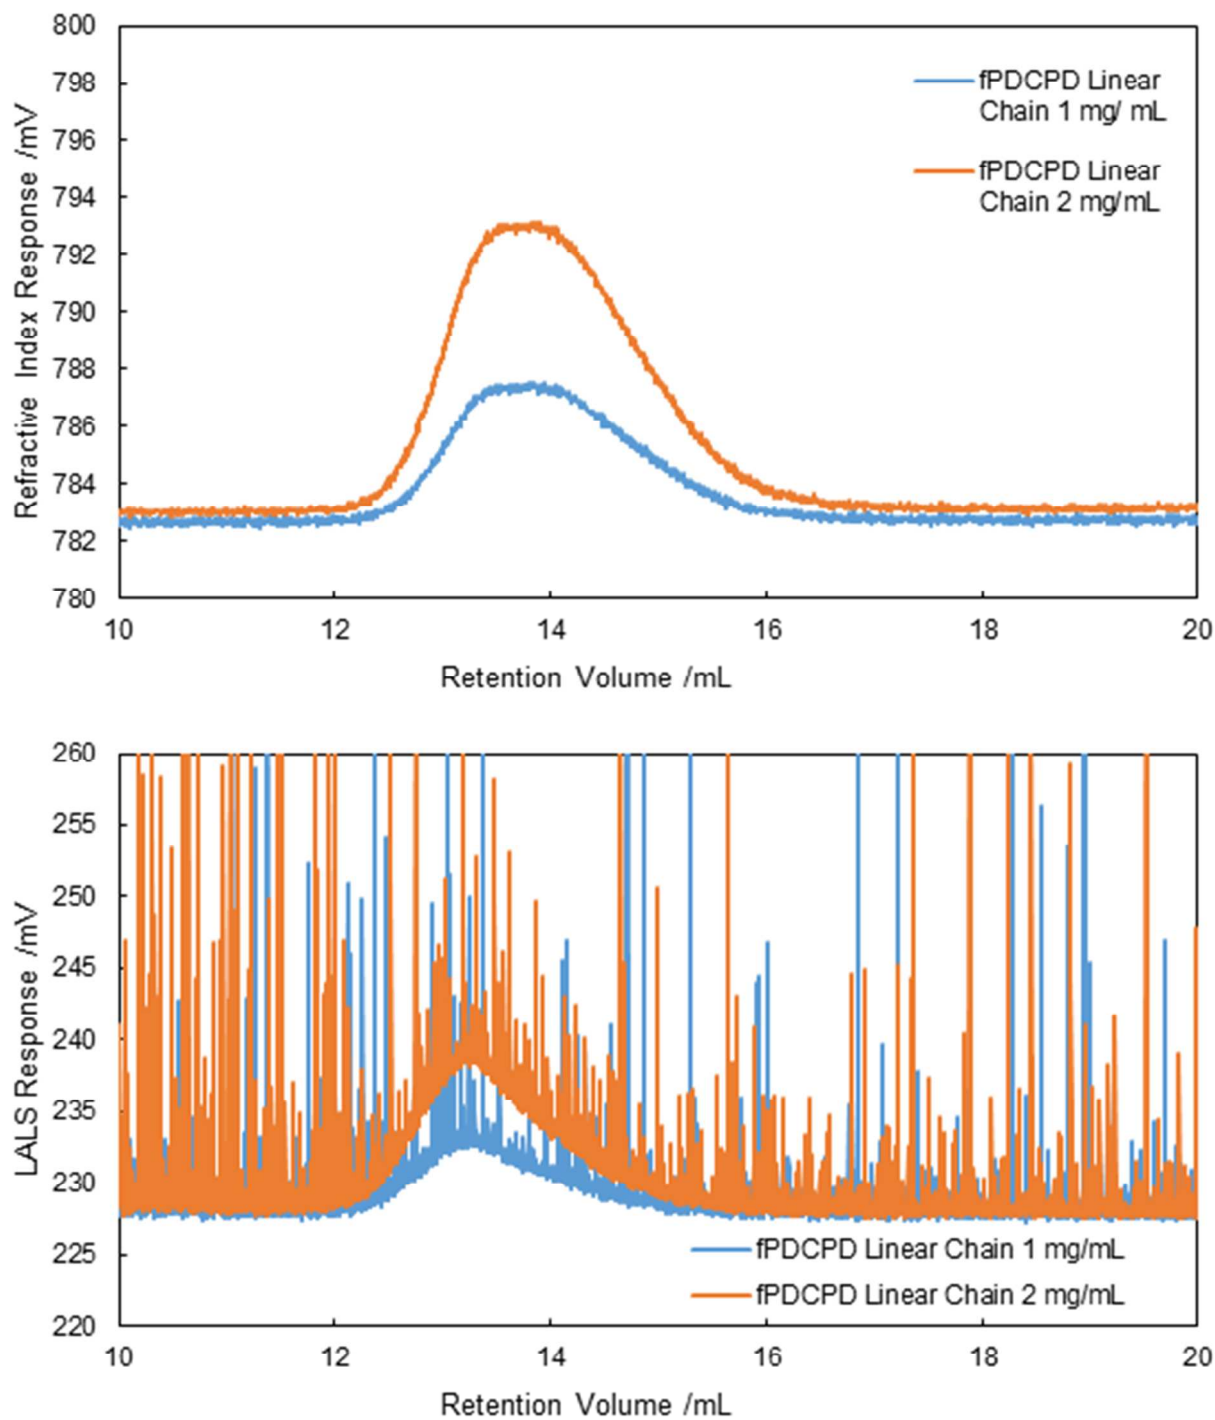

**Figure S1A.** GPC traces of a freshly-prepared (~4-hour-old) sample of polymer **5**. Top trace: refractive index detection. Bottom trace: low angle light scattering detection. Calculated data: 1 mg/mL sample:  $M_w = 94445$  Da,  $M_n = 39824$  Da, PDI = 2.37,  $dn/dc = 0.103$ ; 2 mg/mL Sample:  $M_w = 93290$  Da,  $M_n = 47684$  Da, PDI = 1.96,  $dn/dc = 0.108$ .

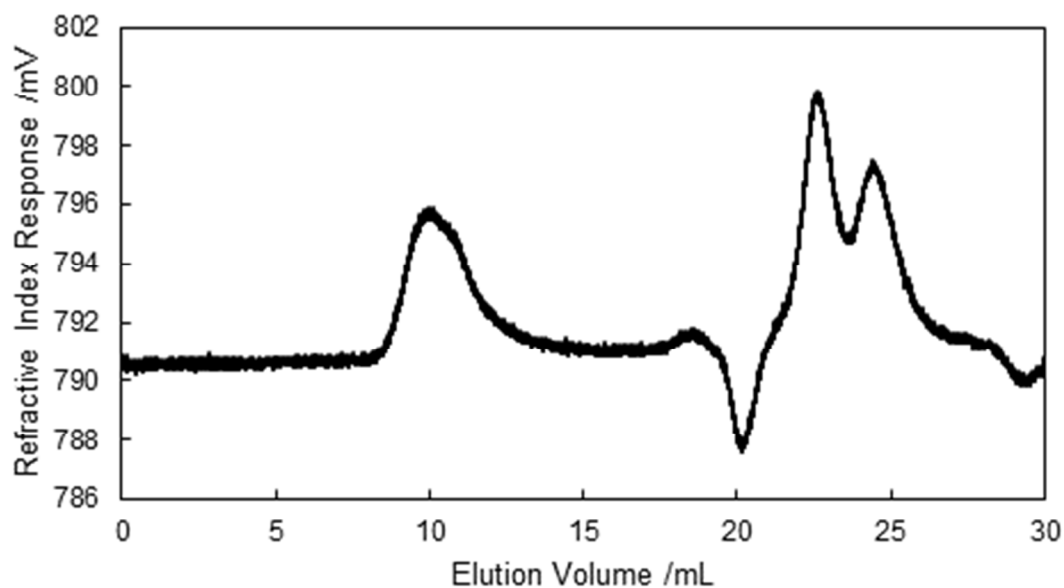

**Figure S1B.** GPC refractive index trace of a 2-day-old sample of polymer **5**. The peak at 10 mL elution volume corresponds to  $M_w$  and  $M_n$  values of 30036272 and 29802748 Da, respectively. The calculated PDI is  $M_w/M_n = 1.008$ , but this number is not particularly meaningful given the amount of oxidative crosslinking that the sample has evidently experienced prior to analysis.

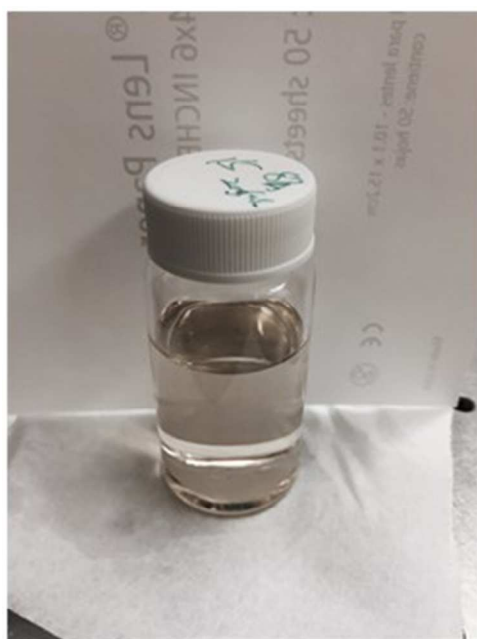

Day 1

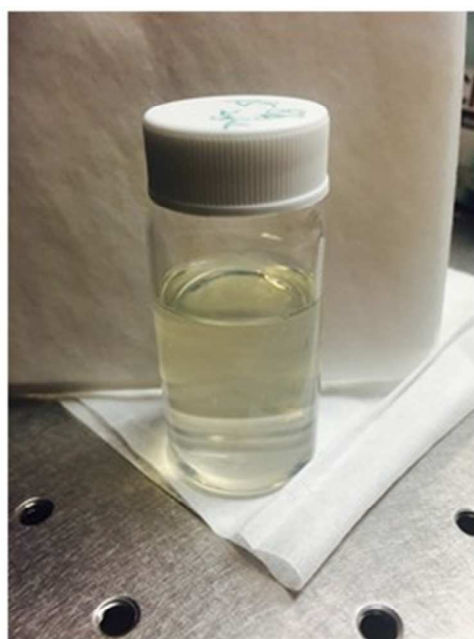

Day 3

**Figure S2.** Comparison between freshly prepared polymer **5** solution and 3-day-old suspension. We attribute the appearance of cloudiness to the precipitation of oxidatively crosslinked polymer.

**Table S1.** Measured Contact Angles for *f*PDCPD and PDCPD.

| polymer                                            | left (°)    | right (°)   | overall (°) |
|----------------------------------------------------|-------------|-------------|-------------|
| methyl ester (H <sub>2</sub> O)                    | 87.0 ± 1.1  | 87.4 ± 0.8  | 87.2 ± 0.9  |
| carboxylate salt (H <sub>2</sub> O)                | 63.3 ± 3.0  | 63.9 ± 2.2  | 63.6 ± 2.5  |
| carboxylic acid (H <sub>2</sub> O)                 | 28.8 ± 1.1  | 29.2 ± 1.2  | 29.0 ± 1.1  |
| methyl ester (CH <sub>2</sub> I <sub>2</sub> )     | 46.0 ± 0.8  | 45.6 ± 1.0  | 45.8 ± 0.9  |
| carboxylate salt (CH <sub>2</sub> I <sub>2</sub> ) | 46.1 ± 1.7  | 46.6 ± 1.5  | 46.4 ± 1.5  |
| carboxylic acid (CH <sub>2</sub> I <sub>2</sub> )  | 52.0 ± 1.6  | 52.4 ± 1.3  | 52.2 ± 1.4  |
| PDCPD (H <sub>2</sub> O)                           | 119.4 ± 1.2 | 120.1 ± 1.5 | 119.8 ± 1.3 |

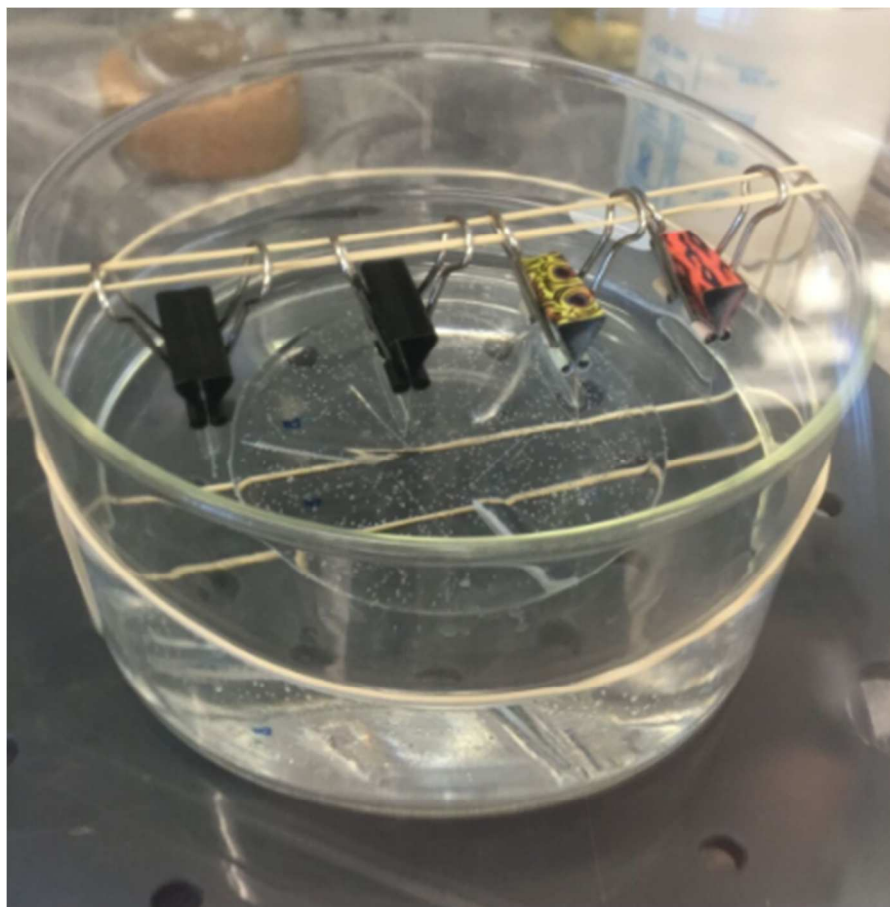

**Figure S3.** Apparatus used for the preparation of slides half coated with polymer **6** and half with polymer **7**. Glass cover slips were first spin coated with linear polymer **5**, then incubated in a 180 °C oven under vacuum overnight to provide crosslinked polymer **6**. The slides were then supported by clips and partially immersed in a solution of methanolic NaOH to facilitate (partial) hydrolysis of surface ester groups.

**Figure S4.**  $^1\text{H}$  NMR spectrum for compounds **3** and **4** (prepared as a mixture).

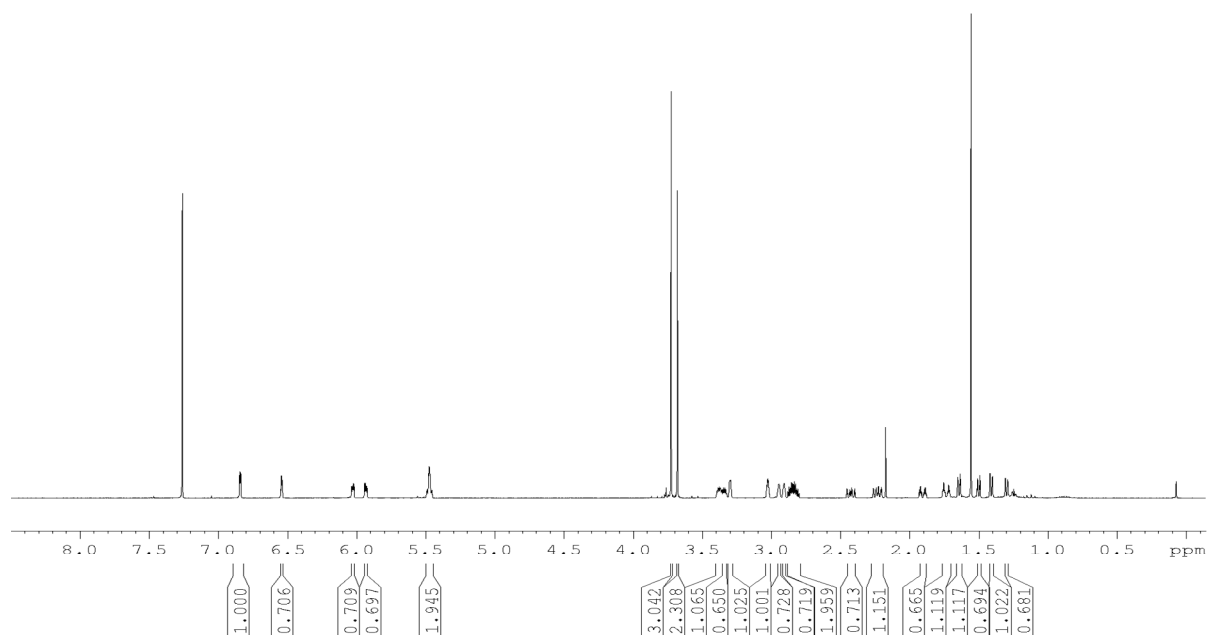

**Figure S5.**  $^{13}\text{C}$  NMR spectrum for compounds **3** and **4** (prepared as a mixture).

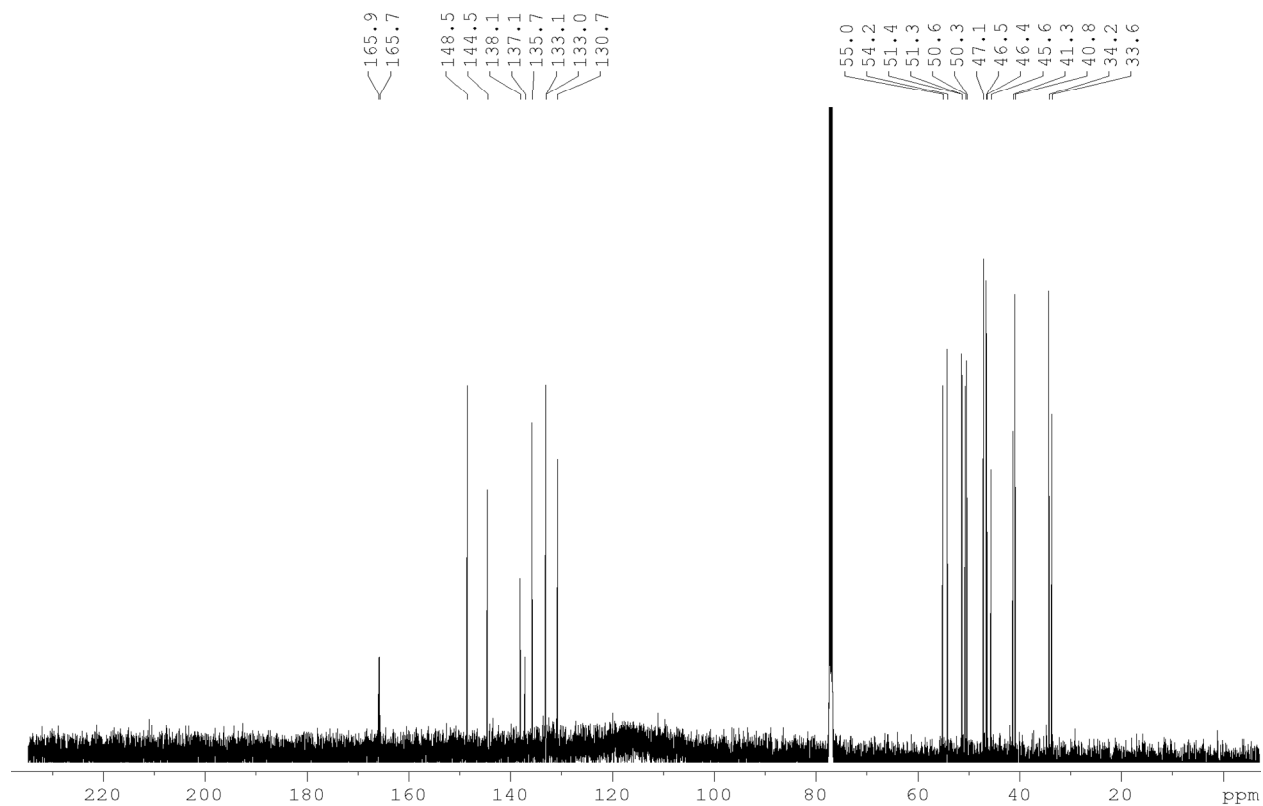

**Figure S6.**  $^1\text{H}$  NMR spectrum for partially purified compound **3**.

(recovered ether supernatant from the synthesis of polymer **5**; contains solvent impurity)

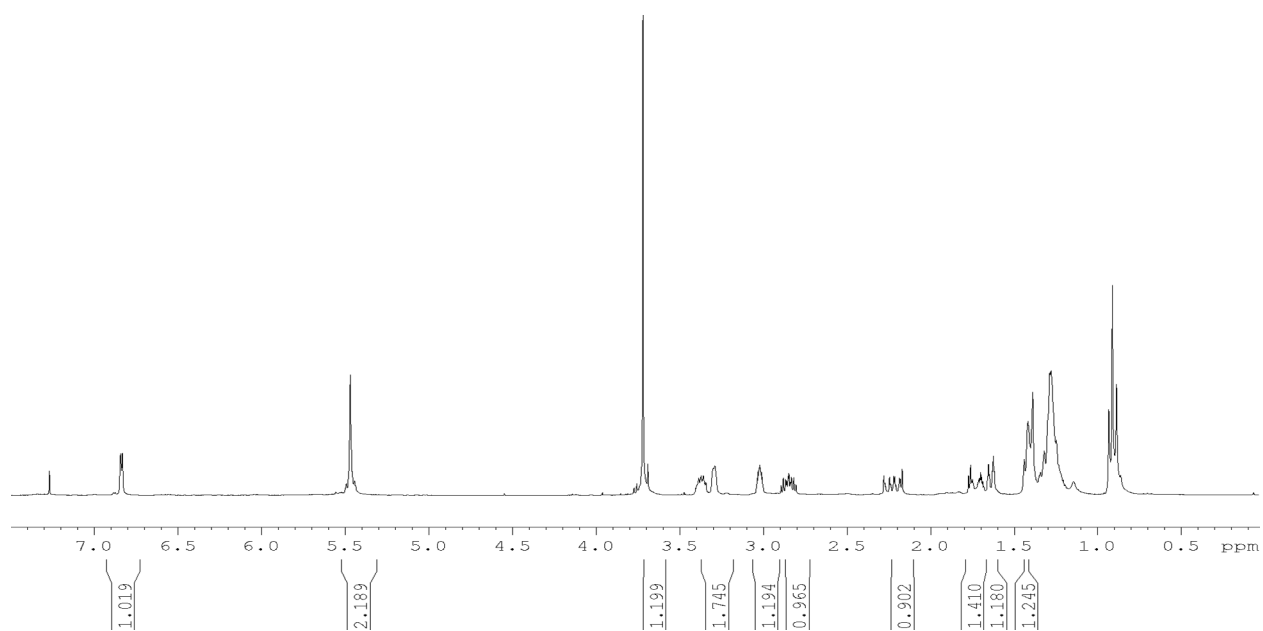

**Figure S7.**  $^1\text{H}$  NMR spectrum for partially purified compound **4**.

(from conjugate addition of benzyl amine to the mixture of **3** and **4**; contains minor impurities)

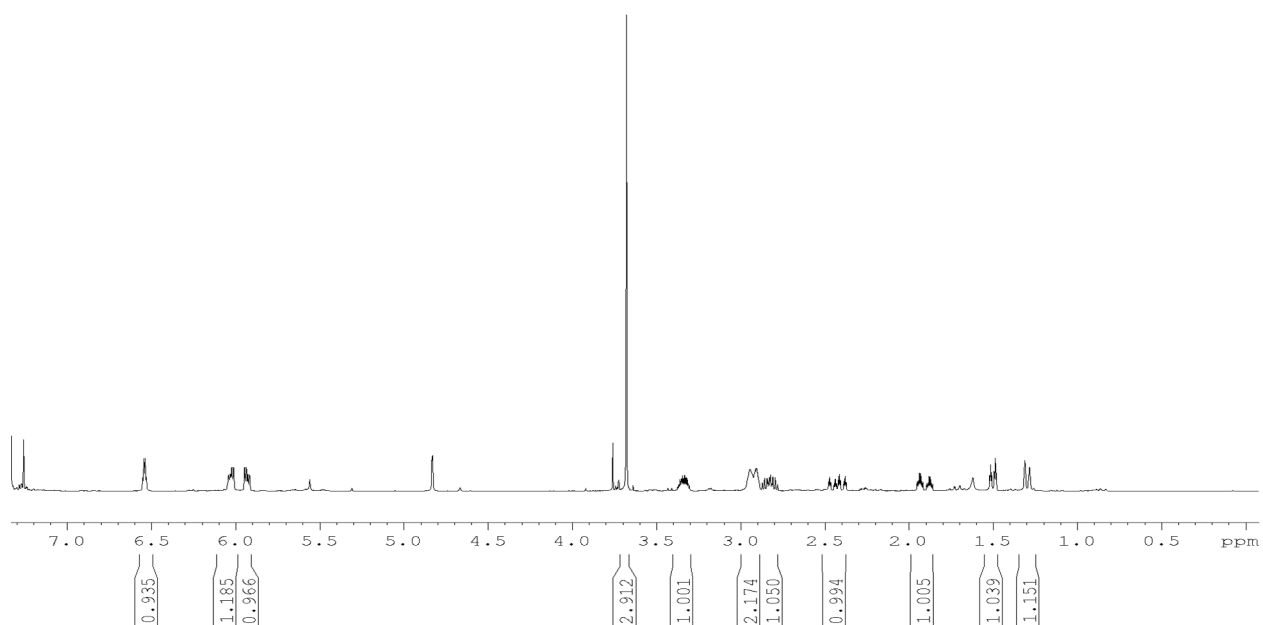

**Figure S8.**  $^1\text{H}$  NMR spectrum for linear polymer **5**.

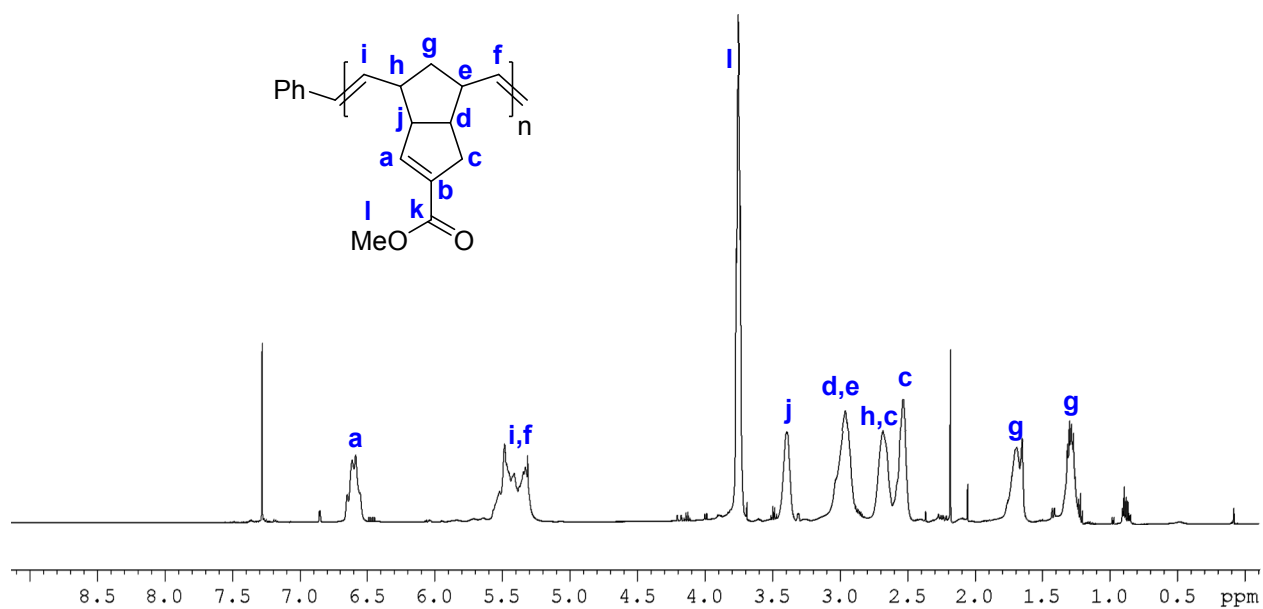

**Figure S9.**  $^{13}\text{C}$  NMR spectrum for linear polymer **5**.

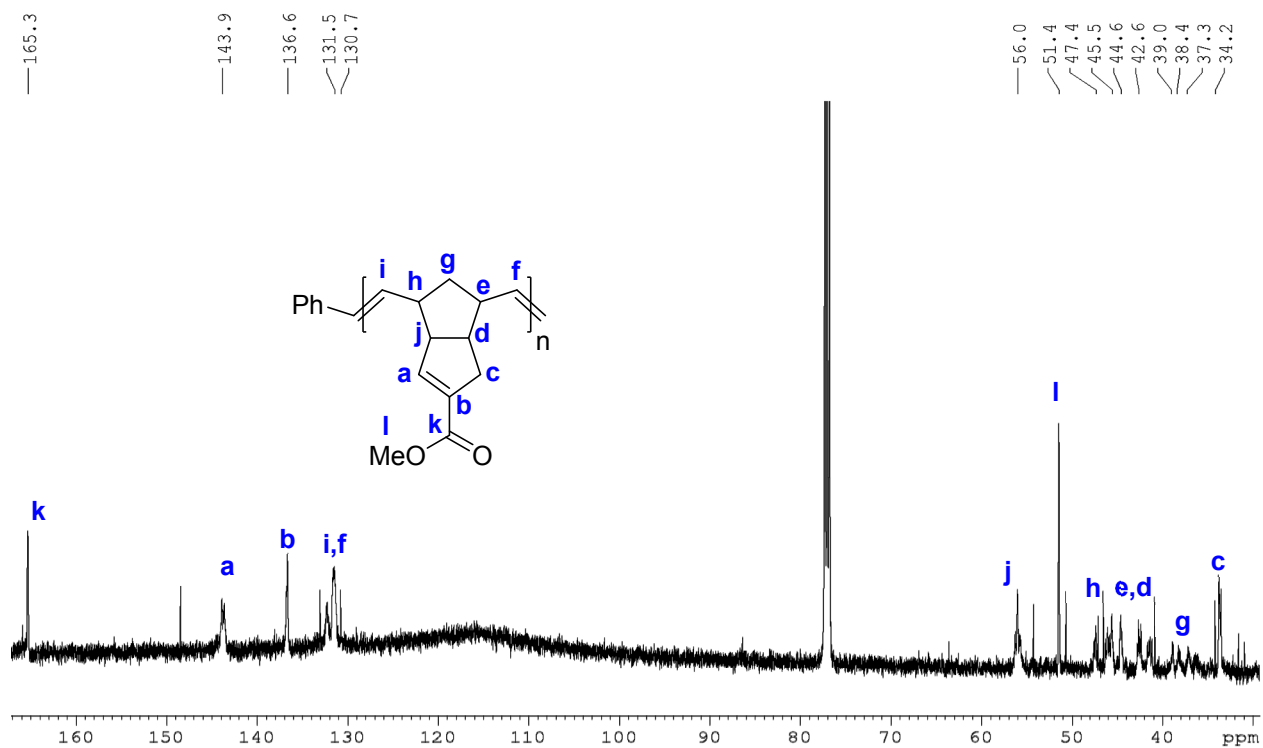

**Figure S10.** HSQC spectrum for linear polymer **5**.

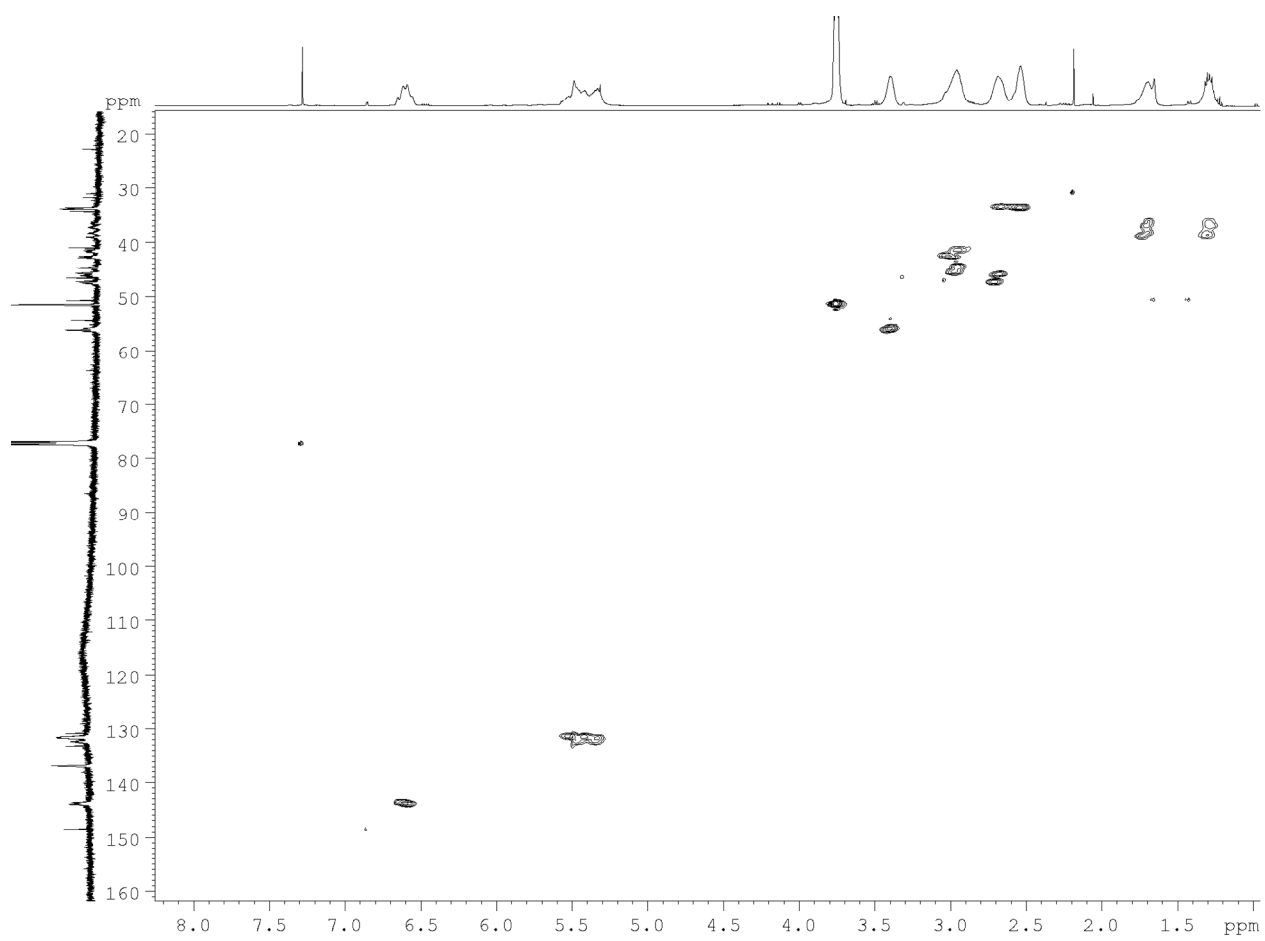



**Figure S11.** COSY spectrum for linear polymer **5**.

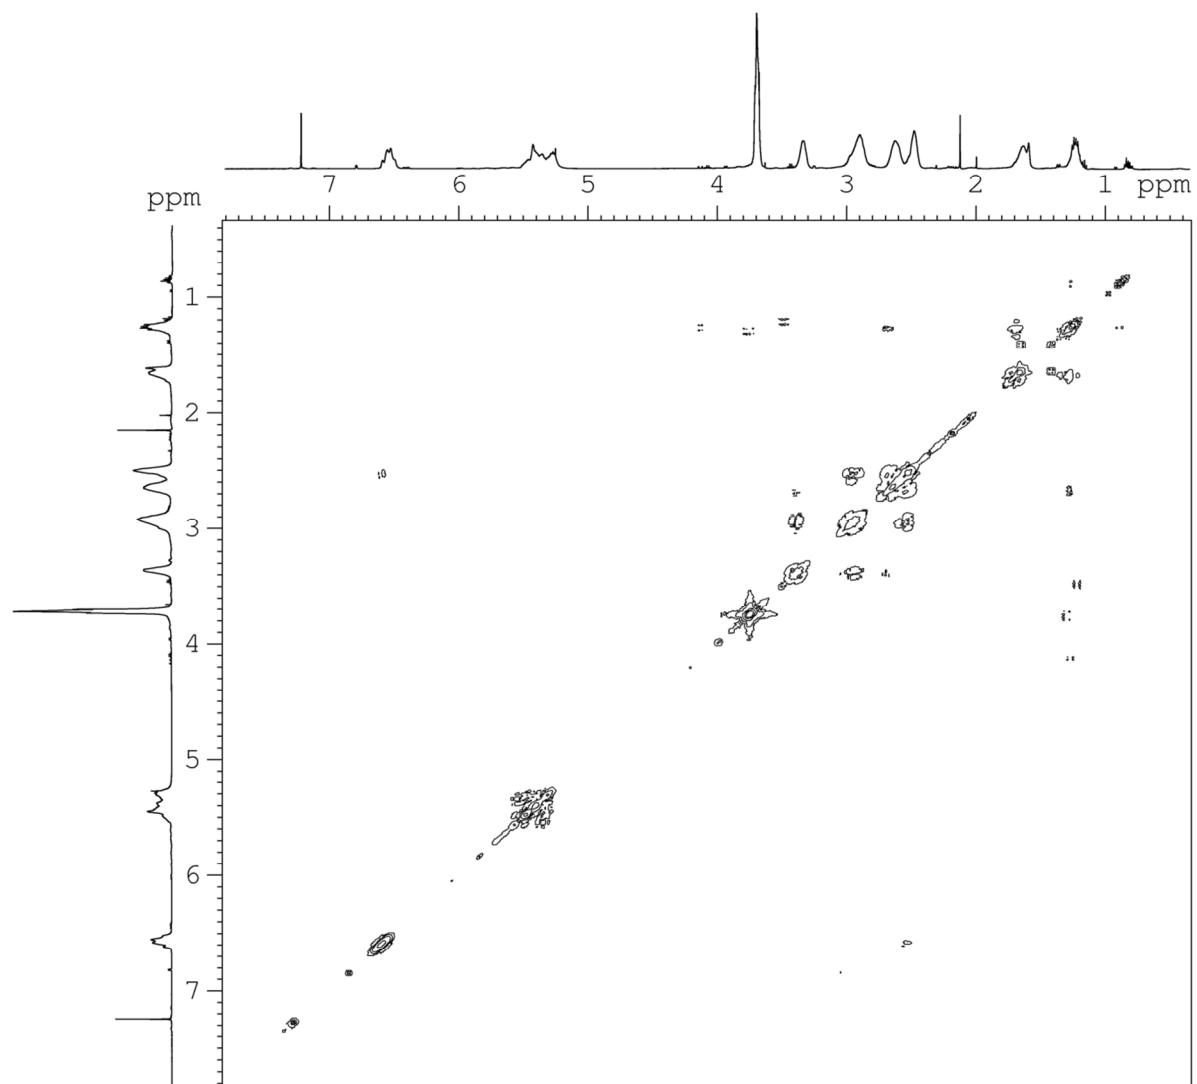

**Figure S12.** Estimated molecular weight of **5** by NMR (in  $\text{CD}_2\text{Cl}_2$ ).

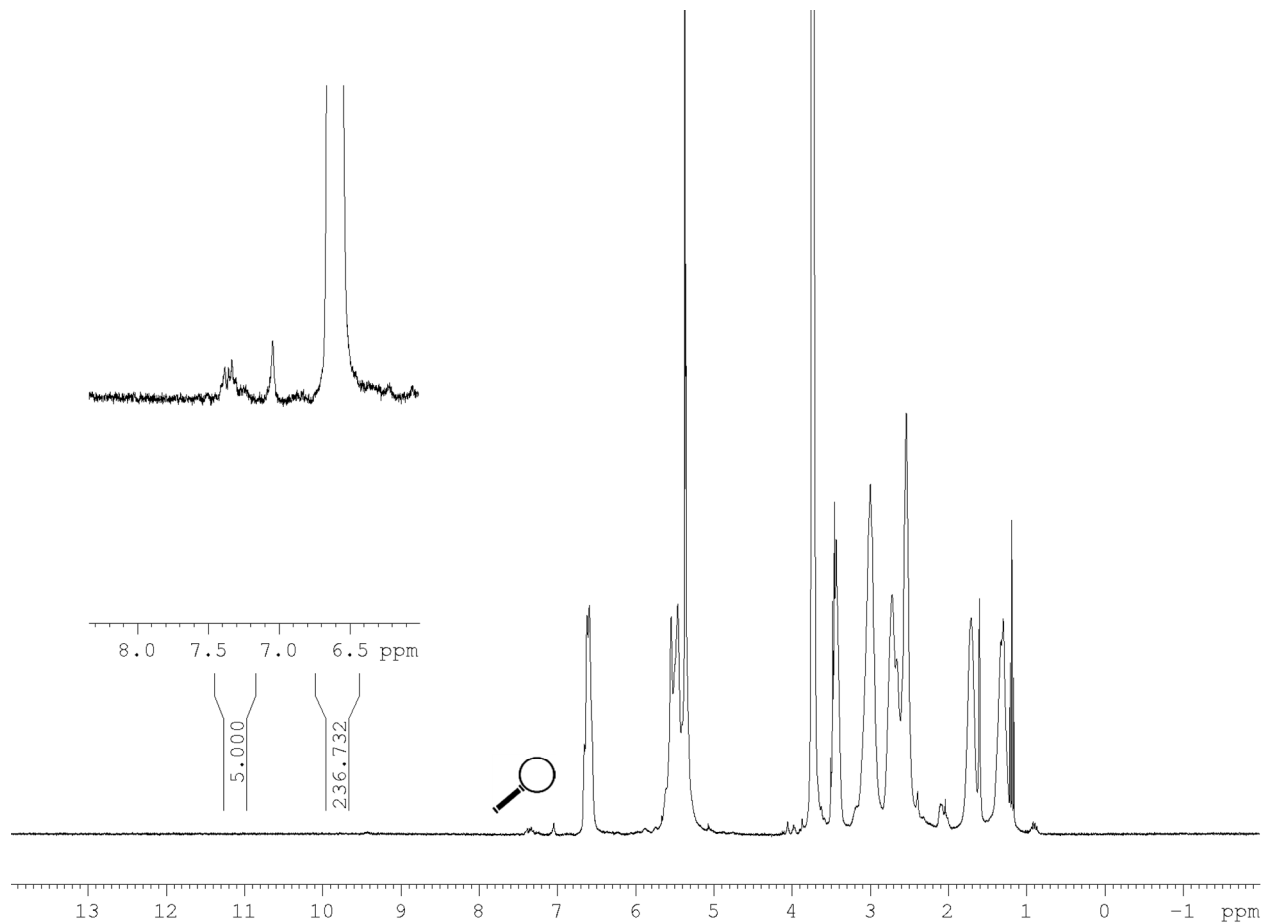

Supplement: ao6b00193_si_001.pdf [file ao6b00193_si_001.pdf]
